# Supplementary material
Source: publisher site journal article supplement (https://www.spandidos-publications.com/2217/downloadSupplementary)

Figure S1. Expression vector of Timp3 up-regulated Timp3 mRNA level in ARPE-19 cells. ARPE-19 cells were transfected with expression vector of Timp3. The mRNA level of Timp3 was assessed by RT-qPCR at 24 h post-transfection. \* $P < 0.05$ . C, control; NC, negative control; RT-qPCR, reverse transcription-quantitative PCR.

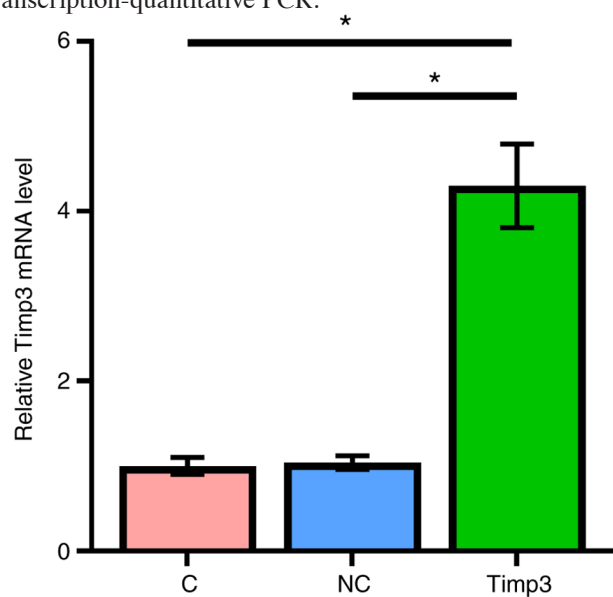

Supplement: Supplementary file 1 [file downloadSupplementary]
